# Supplementary material for: Continuous cropping alters rhizosphere microbial communities and soil properties reducing Curcuma kwangsiensis yield
Source: Research Square preprint supplement (doi:10.21203/rs.3.rs-7313482/v1), 2025-08-20
Supplement: Supplementary file 1 [file 7a9cb4c7dd30e1917ed56e53.docx]

| TableS1 The relative abundances of different bacterial phyla in Y0, Y1 and Y2. Y0, Y1 and Y2 represent planting years for 0, 1 and 2 years, respectively. Different lowercase letters indicate significant differences (*p* < 0.05). | | | |
| --- | --- | --- | --- |
|  | Y0 | Y1 | Y2 |
| Proteobacteria | 12.54 ± 2.91b | 34.89 ± 3.72a | 33.25 ± 2.98a |
| Verrucomicrobiota | 18.50 ± 3.71a | 21.62 ± 4.18a | 14.89 ± 2.97a |
| Acidobacteriota | 18.28 ± 4.99a | 12.02 ± 1.99a | 19.86 ± 8.86a |
| Chloroflexi | 38.10 ± 9.28a | 7.69 ± 2.42b | 3.36 ± 1.14b |
| Bacteroidota | 0.18 ± 0.18b | 12.56 ± 5.74a | 14.05 ± 5.19a |
| Planctomycetota | 1.05 ± 0.40b | 3.45 ± 1.32b | 8.51 ± 3.38a |
| Actinobacteriota | 5.87 ± 1.11a | 1.38 ± 0.34b | 1.45 ± 0.32b |
| Myxococcota | 2.83 ± 0.66a | 3.17 ± 1.38a | 1.99 ± 0.61a |
| Armatimonadota | 0.59 ± 0.30b | 2.19 ± 0.80a | 0.88 ± 0.12b |
| Firmicutes | 1.67 ± 0.89a | 0.19 ± 0.20b | 0.21 ± 0.08b |

TableS2 The relative abundances of different fungal phyla in Y0, Y1 and Y2. Y0, Y1 and Y2 represent planting years for 0, 1 and 2 years, respectively. Different lowercase letters indicate significant differences (*p* < 0.05).

|  | Y0 | Y1 | Y2 |
| --- | --- | --- | --- |
| Basidiomycota | 86.71 ± 5.10a | 6.47 ± 1.77b | 19.30 ± 10..89b |
| Streptophyta | 1.12 ± 0.54c | 68.65 ± 3.23a | 7.03 ± 1.75b |
| Ciliophora | 2.66 ± 2.21b | 3.80 ± 1.54b | 32.44 ± 18.98a |
| Cercozoa | 1.83 ± 0.77b | 2.78 ± 1.55b | 8.27 ± 2.41a |
| Platyhelminthes | 0.01 ± 0.02a | 0.00 ± 0.00a | 12.67 ± 11.07a |
| Mucoromycota | 0.64 ± 0.64b | 7.27 ± 1.94a | 2.34 ± 1.49b |
| Nematoda | 0.13 ± 0.23a | 4.68 ± 4.36a | 3.60 ± 2.55a |
| Arthropoda | 1.93 ± 3.29a | 1.65 ± 1.51a | 4.80 ± 2.07a |
| Ascomycota | 2.04 ± 2.53a | 1.54 ± 0.88a | 0.69 ± 0.20a |
| Chlorophyta | 1.95 ± 1.70a | 0.02 ± 0.01a | 0.44 ± 0.28a |

| TableS3 The relative abundances of different bacterial genus in Y0, Y1 and Y2. Y0, Y1 and Y2 represent planting years for 0, 1 and 2 years, respectively. Different lowercase letters indicate significant differences (*p* < 0.05). | | | |
| --- | --- | --- | --- |
|  | Y0 | Y1 | Y2 |
| *HSB_OF53_F07* | 17.03 ± 4.21a | 3.57 ± 1.44b | 0.95 ± 0.30b |
| *Candidatus_Xiphinematobacter* | 12.97 ± 2.85a | 6.16 ± 0.47b | 1.91 ± 0.38c |
| *Acidibacter* | 4.20 ± 1.89b | 7.04 ± 0.71a | 3.75 ± 0.42b |
| *Candidatus_Solibacter* | 3.29 ± 1.58a | 4.86 ± 1.13a | 5.49 ± 3.99a |
| *Bradyrhizobium* | 2.94 ± 0.69b | 5.60 ± 1.39a | 4.93 ± 0.86ab |
| *Tepidisphaera* | 1.04 ± 0.37b | 2.65 ± 1.19b | 7.76 ± 3.03a |
| *ADurb.Bin063_1* | 0.46 ± 0.26b | 6.41 ± 2.54a | 4.26 ± 0.97a |
| *Occallatibacter* | 3.47 ± 0.49b | 1.59 ± 0.03b | 5.74 ± 1.57a |
| *Burkholderia_Caballeronia_Paraburkholderia* | 0.51 ± 0.09b | 4.30 ± 0.51a | 4.08 ± 0.80a |
| *Candidatus_Udaeobacter* | 3.41 ± 1.16a | 2.70 ± 2.38a | 2.65 ± 0.57a |

TableS4 The relative abundances of different fungal genus in Y0, Y1 and Y2. Y0, Y1 and Y2 represent planting years for 0, 1 and 2 years, respectively. Different lowercase letters indicate significant differences (*p* < 0.05).

|  | Y0 | Y1 | Y2 |
| --- | --- | --- | --- |
| *Galerina* | 72.39 ± 8.19a | 3.14 ± 1.76b | 1.39 ± 0.92c |
| *Liatris* | 0.21 ± 0.09c | 68.52 ± 3.18a | 5.36 ± 2.41b |
| *Gymnopus* | 13.35 ± 4.64a | 0.02 ± 0.03b | 0.34 ± 0.10b |
| *Stenostomum* | 0.01 ± 0.02a | 0.00 ± 0.00a | 12.37±11.07a |
| *Sphaerobolus* | 0.00 ± 0.00a | 0.03 ± 0.03a | 11.52 ± 14.84a |
| *Gastrostyla* | 0.00 ± 0.00a | 0.00 ± 0.00a | 9.96 ± 17.19a |
| *Gonostomum* | 0.00 ± 0.00b | 0.88 ± 1.14b | 5.07 ± 2.37a |
| *Urostyla* | 0.00 ± 0.00b | 0.64 ± 0.96b | 4.13 ± 3.27a |
| *Platyophrya* | 1.47 ± 1.46b | 0.64 ± 0.17b | 2.53 ± 0.48a |
| *Prismatolaimus* | 0.05 ± 0.09b | 0.01 ± 0.01b | 4.13 ± 3.95a |
|  | | | |
